# Supplementary material for: High proton conductivity modulated by active protons in 1D ultra-stable metal–organic coordination polymers: a new insight into the coordination interaction/ability of metal ions
Source: Royal Society of Chemistry journal article supplement (doi:10.1039/d2qi01459a), 2022-12-22
Supplement: d2qi01459a1.pdf [file d2qi01459a1.pdf]

## Supporting information for the paper:

### **High proton conductivity modulated by active protons in 1D ultra-stable metal-organic coordination polymers : a new insight into coordination interaction/ability of metal ion**

Xiaoqiang Liang, \*<sup>a</sup> Sen Wang,<sup>a</sup> Siqing Zhang,<sup>a</sup> Chenyang Lin,<sup>a</sup> Fengxia Xie,<sup>a</sup>  
Renzhong Li, \*<sup>a</sup> Feng Zhang,<sup>\*c</sup> Chen Wen,<sup>b</sup> Lei Feng<sup>b</sup> and Chengan Wan<sup>b</sup>

<sup>a</sup> *College of Environmental and Chemical Engineering, Xi'an Polytechnic University, Xi'an 710048, PR China*

<sup>b</sup> *Beijing Spacecrafts, Beijing 100094, PR China*

<sup>c</sup> *Key Laboratory of Photochemical Biomaterials and Energy Storage Materials, Heilongjiang Province and College of Chemistry and Chemical Engineering, Harbin Normal University, Harbin 150025, PR China*

## Table of Contents

| Section     | Content                                                                                                                 | Page    |
|-------------|-------------------------------------------------------------------------------------------------------------------------|---------|
| <b>I</b>    | Crystallographic data                                                                                                   | S3–S5   |
| <b>II</b>   | Characterization: PXRD patterns                                                                                         | S6      |
| <b>III</b>  | Characterization: IR spectra                                                                                            | S7      |
| <b>IV</b>   | Characterization: XPS survey spectra                                                                                    | S8      |
| <b>V</b>    | Characterization: SEM images                                                                                            | S9      |
| <b>VI</b>   | Stability: TGA curves                                                                                                   | S10     |
| <b>VII</b>  | Stability: Nitrogen sorption measurements                                                                               | S11-12  |
| <b>VIII</b> | Stability: IR Spectra                                                                                                   | S13     |
| <b>IX</b>   | Stability: PXRD pattern and IR spectrum of Mn-pzdc-H <sub>3</sub> O <sup>+</sup> after being treated with boiling water | S14     |
| <b>X</b>    | Water adsorption–desorption isotherms                                                                                   | S15     |
| <b>XI</b>   | Electrochemical measurements: impedance spectra                                                                         | S16–S21 |
| <b>XII</b>  | PXRD patterns after impedance measurements.                                                                             | S22     |
| <b>XIII</b> | Comparison of chemical stability                                                                                        | S23     |
| <b>XIV</b>  | Comparison of proton conductivity                                                                                       | S24–S25 |
| <b>XV</b>   | References for Supporting Information                                                                                   | S26–S27 |

## I. Crystallographic data

Table S1 Crystallographic data and details of refinements for previously reported **Zn-pzdc-H<sub>3</sub>O<sup>+</sup>**, **Mn-pzdc-H<sub>3</sub>O<sup>+</sup>** and **Cu-Hpzdc-H<sub>2</sub>O**.<sup>1-3</sup>

| Compounds                                                                          | Zn-pzdc-H <sub>3</sub> O <sup>+</sup>                             | Mn-pzdc-H <sub>3</sub> O <sup>+</sup>                             | Cu-Hpzdc-H <sub>2</sub> O                                         |
|------------------------------------------------------------------------------------|-------------------------------------------------------------------|-------------------------------------------------------------------|-------------------------------------------------------------------|
| Empirical formula                                                                  | C <sub>12</sub> H <sub>10</sub> N <sub>4</sub> O <sub>10</sub> Zn | C <sub>12</sub> H <sub>10</sub> N <sub>4</sub> O <sub>10</sub> Mn | C <sub>12</sub> H <sub>10</sub> N <sub>4</sub> O <sub>10</sub> Cu |
| <i>Mr</i>                                                                          | 453.62                                                            | 425.17                                                            | 433.77                                                            |
| Crystal system                                                                     | Monoclinic                                                        | Monoclinic                                                        | Monoclinic                                                        |
| Space group                                                                        | <i>C2/c</i>                                                       | <i>C2/c</i>                                                       | <i>P2<sub>1</sub>/n</i>                                           |
| <i>a</i> (Å)                                                                       | 14.478(3)                                                         | 14.484 (2)                                                        | 6.6163(14)                                                        |
| <i>b</i> (Å)                                                                       | 8.439(2)                                                          | 8.480 (1)                                                         | 14.174(2)                                                         |
| <i>c</i> (Å)                                                                       | 12.861(3)                                                         | 13.087 (1)                                                        | 8.5821(14)                                                        |
| <i>α</i> (°)                                                                       | 90                                                                | 90                                                                | 90                                                                |
| <i>β</i> (°)                                                                       | 114.66(3)                                                         | 114.753 (7)                                                       | 97.62(2)                                                          |
| <i>γ</i> (°)                                                                       | 90                                                                | 90                                                                | 90                                                                |
| <i>V</i> (Å <sup>3</sup> )                                                         | 1428.05                                                           | 1459.71                                                           | 797.7(2)                                                          |
| <i>Z</i>                                                                           | 4                                                                 | 4                                                                 | 2                                                                 |
| <i>D<sub>c</sub></i> (g cm <sup>-3</sup> )                                         | 2.026                                                             | 1.93                                                              | 1.806                                                             |
| <i>μ</i> (mm <sup>-1</sup> )                                                       | 1.79                                                              | 0.901                                                             | 1.436                                                             |
| <i>F</i> (000)                                                                     | 880                                                               | n/a                                                               | 438                                                               |
| Collected reflections                                                              | 1986                                                              | 3855                                                              | 3511                                                              |
| Unique reflections                                                                 | 1628                                                              | 2039                                                              | 1407                                                              |
| Parameters                                                                         | 143                                                               | 144                                                               | 137                                                               |
| <i>T</i> (K)                                                                       | 293                                                               | 293                                                               | 294                                                               |
| Final <i>R</i> <sub>1</sub> <sup>[a]</sup> , <i>wR</i> <sub>2</sub> <sup>[b]</sup> | 0.0334, 0.1045                                                    | 0.0332, 0.0242                                                    | 0.0410, 0.0830                                                    |
|                                                                                    | [ <i>F</i> <sub>o</sub> > 4σ ( <i>F</i> <sub>o</sub> )]           | [ <i>F</i> <sub>o</sub> > 3σ ( <i>F</i> <sub>o</sub> )]           | [ <i>I</i> > 2σ ( <i>I</i> )]                                     |
| GOF                                                                                | 1.104                                                             | n/a                                                               | 1.071                                                             |
|                                                                                    | [ <i>F</i> <sub>o</sub> > 4σ ( <i>F</i> <sub>o</sub> )]           |                                                                   | [ <i>I</i> > 2σ ( <i>I</i> )]                                     |
| Largest peak and hole (e <sup>-</sup> · Å <sup>-3</sup> )                          | 0.84, -0.38                                                       | 0.4, -0.4                                                         | n/a, n/a                                                          |

Table S2 Selected bond lengths (Å) and angles (°) for previously reported **Zn-pzdc-H<sub>3</sub>O<sup>+</sup>**, **Mn-pzdc-H<sub>3</sub>O<sup>+</sup>** and **Cu-Hpzdc-H<sub>2</sub>O**.<sup>1-3</sup>

| <b>Zn-pzdc-H<sub>3</sub>O<sup>+</sup></b> |           |                   |            |
|-------------------------------------------|-----------|-------------------|------------|
| Zn(1)–O(4)                                | 2.071(2)  | Zn(1)–O(4a)       | 2.071(2)   |
| Zn(1)–N(2)                                | 2.184(2)  | Zn(1)–N(2a)       | 2.184(2)   |
| Zn(1)–O(1b)                               | 2.092(2)  | Zn(1)–O(1c)       | 2.092(2)   |
| O(4)–Zn(1)–O(1b)                          | 105.94(6) | O(4)–Zn(1)–O(1c)  | 88.11(6)   |
| O(4)–Zn(1)–N(2)                           | 77.27(6)  | O(4)–Zn(1)–O(4a)  | 161.68(7)  |
| N(2)–Zn(1)–N(2b)                          | 106.68(7) | N(2)–Zn(1)–O(1b)  | 159.09(7)  |
| N(2)–Zn(1)–O(4a)                          | 91.73(6)  | N(2)–Zn(1)–O(1c)  | 88.40(7)   |
| O(1b)–Zn(1)–O(1c)                         | 81.26(7)  |                   |            |
| <b>Mn-pzdc-H<sub>3</sub>O<sup>+</sup></b> |           |                   |            |
| Mn(1)–O(3)                                | 2.137(1)  | Mn(1)–O(1)        | 2.153(1)   |
| Mn(1)–N(2)                                | 2.307(2)  | Mn(1)–O(3a)       | 2.137(1)   |
| Mn(1)–O(1a)                               | 2.153(1)  | Mn(1)–N(2a)       | 2.307(2)   |
| O(3)–Mn(1)–O(3a)                          | 82.62(7)  | O(3)–Mn(1)–O(1)   | 106.92(4)  |
| O(3)–Mn(1)–O(1)                           | 90.45(4)  | O(3)–Mn(1)–N(2)   | 158.44(4)  |
| N(2)–Mn(1)–N(2a)                          | 106.83(9) | O(3a)–Mn(1)–N(2a) | 88.01(5)   |
| O(1b)–Mn(1)–N(2a)                         | 73.71(5)  | O(1)–Mn(1)–N(2a)  | 92.48(5)   |
| O(1)–Mn(1)–O(1a)                          | 157.05(5) |                   |            |
| <b>Cu-Hpzdc-H<sub>2</sub>O</b>            |           |                   |            |
| Cu(1)–O(1)                                | 1.947(3)  | Cu(1)–N(1)        | 1.997(3)   |
| Cu(1)–O(4b)                               | 2.401(3)  | Cu(1)–O(1a)       | 1.947(3)   |
| Cu(1)–N(1a)                               | 1.997(3)  | Cu(1)–O(4c)       | 2.401(3)   |
| O(1)–Cu(1)–O(1a)                          | 180.0     | O(1)–Cu(1)–O(4b)  | 94.24(10)  |
| O(1)–Cu(1)–N(1a)                          | 96.80(11) | O(1)–Cu(1)–O(4c)  | 85.77(10)  |
| N(1)–Cu(1)–O(4b)                          | 91.41(10) | O(1a)–Cu(1)–N(1a) | 83.20(11)  |
| N(1a)–Cu(1)–O(4c)                         | 88.59(10) | O(4c)–Cu(1)–O(4b) | 180.00(91) |

Symmetry codes : a)  $1-x, y, 1/2-z$ ; b)  $x, 2-y, -1/2+z$ ; c)  $1-x, 2-y, -z$  for **Zn-pzdc-H<sub>3</sub>O<sup>+</sup>**; a)  $-x, y, 1/2-z$  for **Mn-pzdc-H<sub>3</sub>O<sup>+</sup>**; a)  $2-x, 1-y, 1-z$ ; b)  $1-x, 1-y, 1-z$ ; c)  $-x, 1-y, 1-z$  for **Cu-Hpzdc-H<sub>2</sub>O**.

Table S3 Hydrogen-bonding geometry parameters (Å, °) for **Zn-pzdc-H<sub>3</sub>O<sup>+</sup>**, **Mn-pzdc-H<sub>3</sub>O<sup>+</sup>** and **Cu-Hpzdc-H<sub>2</sub>O**.<sup>1-3</sup>

| D-H...A                                   | d(D-H)  | d(H...A) | d(D...A) | ∠(DHA) |
|-------------------------------------------|---------|----------|----------|--------|
| <b>Zn-pzdc-H<sub>3</sub>O<sup>+</sup></b> |         |          |          |        |
| O(1W)-H(1WX)...O(2)                       | 1.03(4) | 1.48(4)  | 2.501(3) | 177(4) |
| O(1W)-H(1WY)...O(3d)                      | 0.86(8) | 1.81(7)  | 2.496(3) | 136(7) |
| O(1W)-H(1WZ)...N(1e)                      | 0.88(4) | 1.87(4)  | 2.745(3) | 175(4) |
| <b>Mn-pzdc-H<sub>3</sub>O<sup>+</sup></b> |         |          |          |        |
| O(1W)-H(1WX)...O(4b)                      | 1.04(3) | 1.49(3)  | 2.518(2) | 170(2) |
| O(1W)-H(1WY)...O(2c)                      | 1.04(3) | 1.45(3)  | 2.483(2) | 175(3) |
| O(1W)-H(1WZ)...N(1d)                      | 0.90(3) | 1.86(3)  | 2.747(2) | 175(4) |
| <b>Cu-Hpzdc-H<sub>2</sub>O</b>            |         |          |          |        |
| O(3d)-H(3d)...O(1W)                       | 1.09(8) | 1.44(8)  | 2.510(5) | 169(7) |
| O(1W)-H(1WX)...O(2d)                      | 0.68(5) | 2.00(5)  | 2.680(5) | 173(5) |
| O(1W)-H(1WY)...N(2e)                      | 0.82(6) | 2.03(6)  | 2.844(5) | 175(6) |

Symmetry codes: d)  $x-1/2, -y+3/2, z+1/2$ ; e)  $x-1/2, y-1/2, z+1$  for **Zn-pzdc-H<sub>3</sub>O<sup>+</sup>**; b)  $-x, y, 3/2-z$ ; c)  $-x, -y, 1-z$ ; d)  $x, -y, 1/2+z$  for **Mn-pzdc-H<sub>3</sub>O<sup>+</sup>**; d)  $-1+x, y, z$ ; e)  $1-x, 1-y, -z$  for **Cu-Hpzdc-H<sub>2</sub>O**.

## II. Characterization: PXRD patterns

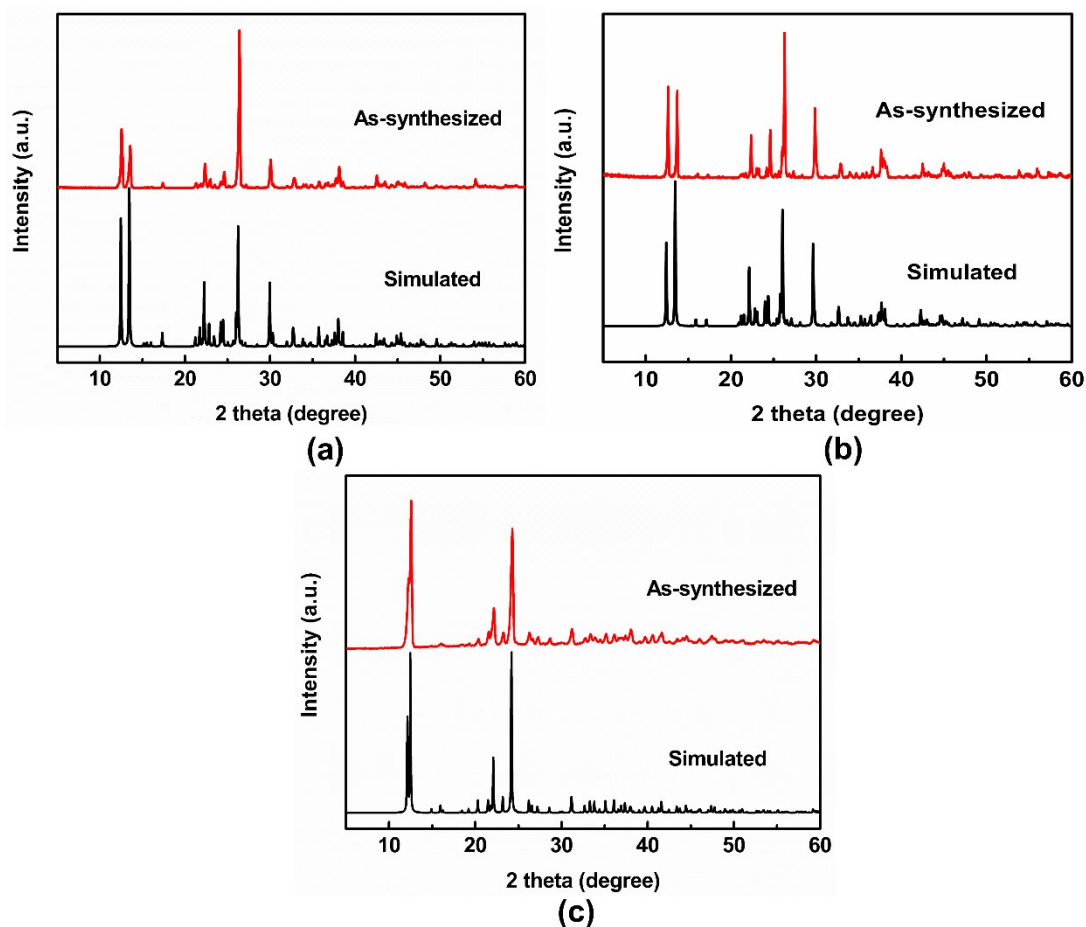

**Fig. S1** (a) The PXRD patterns for **Zn-pzdc-H<sub>3</sub>O<sup>+</sup>** of a simulation based on single-crystal analysis and as-synthesized bulk crystals. (b) The PXRD patterns for **Mn-Hpzdc-H<sub>3</sub>O<sup>+</sup>** of a simulation based on single-crystal analysis and as-synthesized bulk crystals. (c) The PXRD patterns for **Cu-Hpzdc-H<sub>2</sub>O** of a simulation based on single-crystal analysis and as-synthesized bulk crystals.

### III. Characterization: IR Spectra

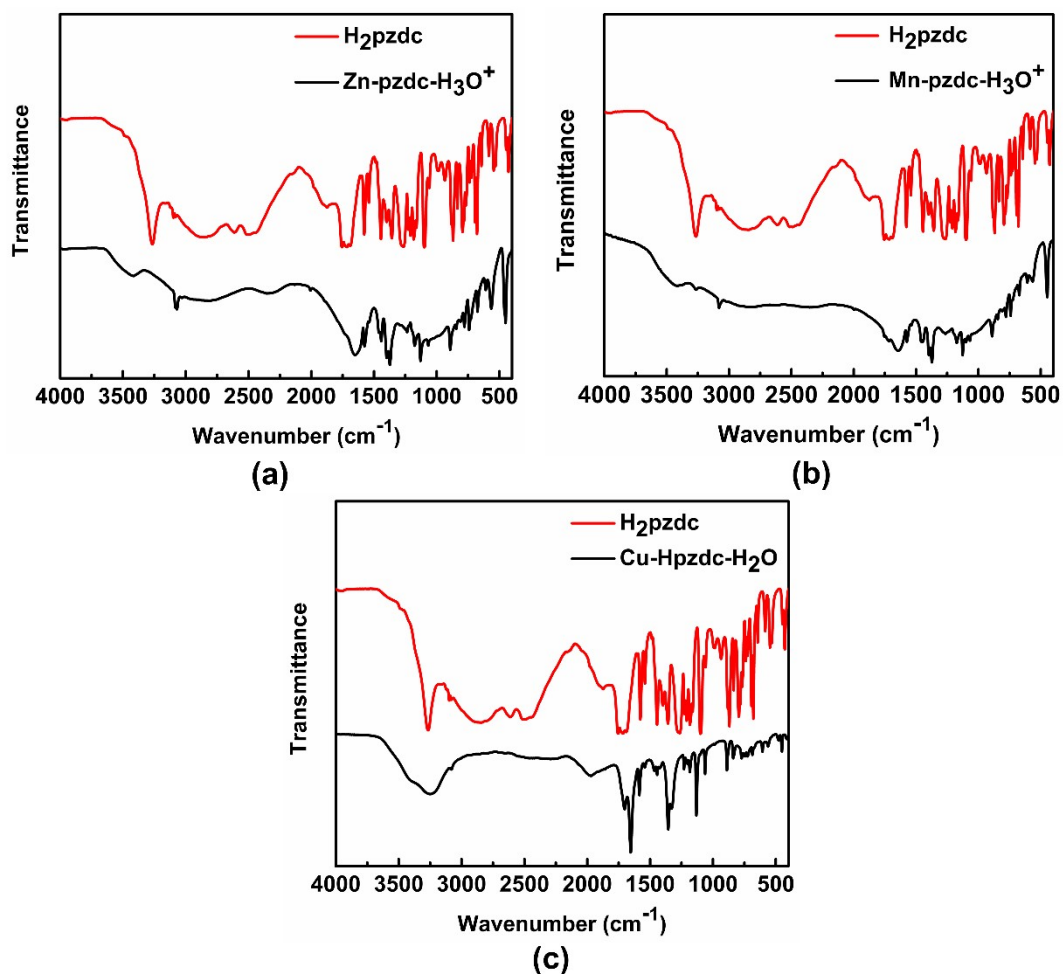

**Fig. S2** (a) IR spectra of **H<sub>2</sub>pzdc** together with **Zn-pzdc-H<sub>3</sub>O<sup>+</sup>** (a), **Mn-pzdc-H<sub>3</sub>O<sup>+</sup>** (b) and **Cu-Hpzdc-H<sub>2</sub>O** (c) in the solid state at room temperature (performed on a Bruker IFS-66V/S FT-IR spectrometer).

#### IV. Characterization: XPS survey spectra

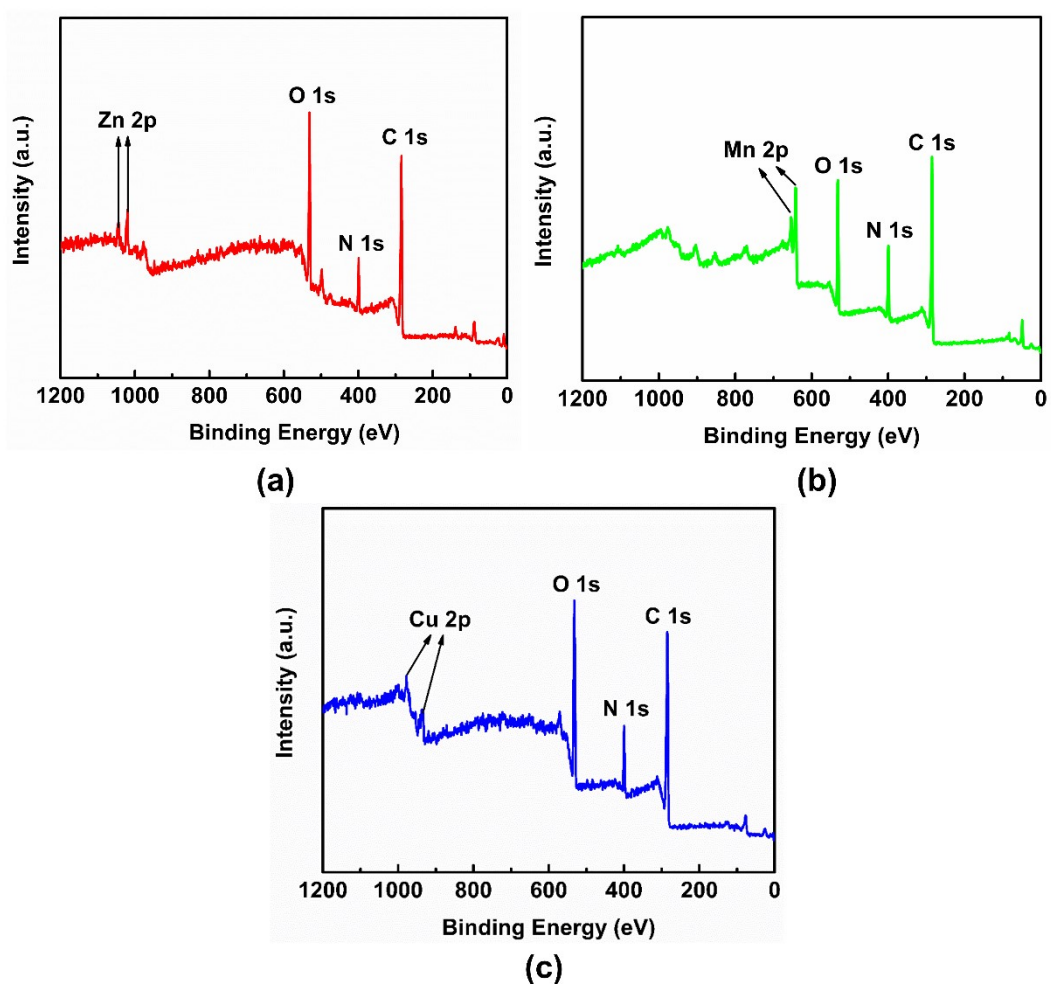

**Fig. S3** XPS survey spectra of Zn-pzdc-H<sub>3</sub>O<sup>+</sup> (a), Mn-pzdc-H<sub>3</sub>O<sup>+</sup> (b) and Cu-Hpzdc-H<sub>2</sub>O (c).



## V. Characterization: SEM images

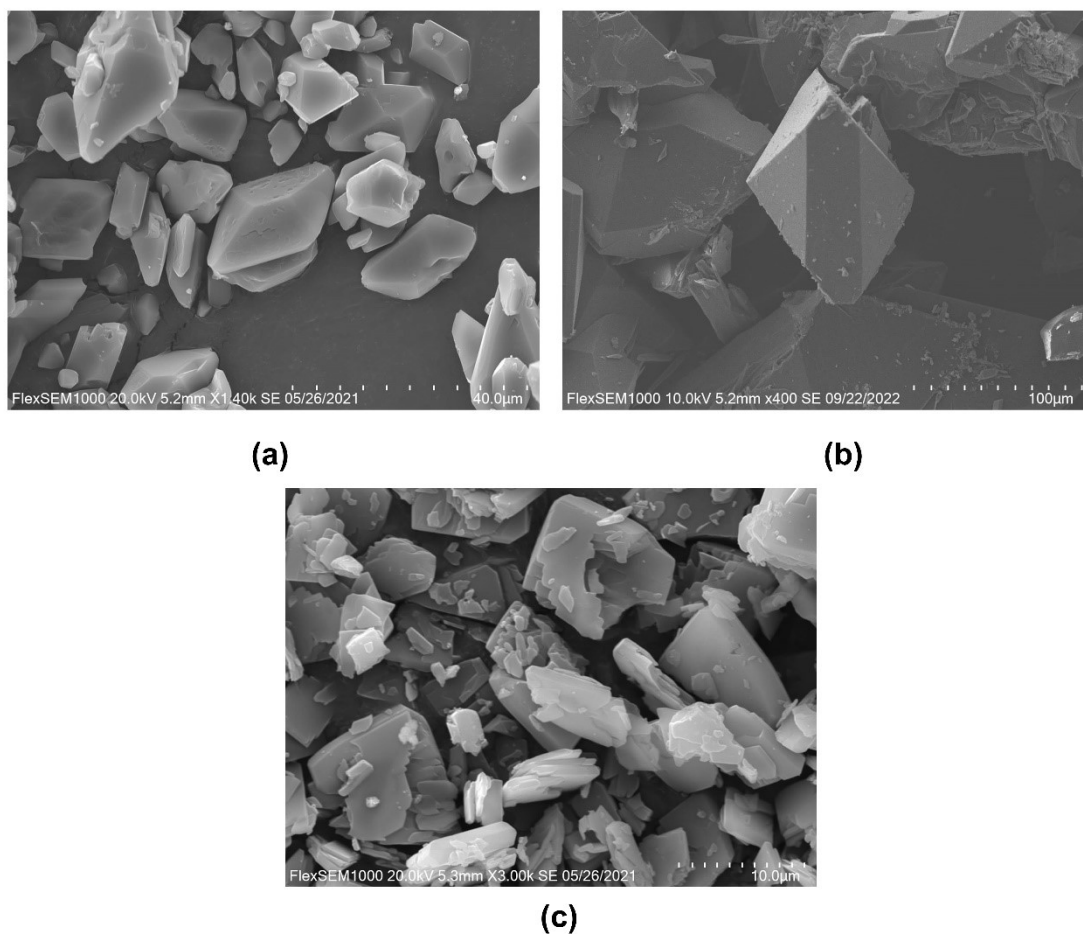

**Fig. S4** SEM images of  $\text{Zn-pzdc-H}_3\text{O}^+$  (a),  $\text{Mn-pzdc-H}_3\text{O}^+$  (b) and  $\text{Cu-Hpzdc-H}_2\text{O}$  (c).

The SEM images reveal that  $\text{Zn-pzdc-H}_3\text{O}^+$  and  $\text{Mn-pzdc-H}_3\text{O}^+$  are unique polyhedral morphology with about 2–24 μm and 35–80 μm in sizes, respectively, and  $\text{Cu-Hpzdc-H}_2\text{O}$  has a uniformly sheet-like structure with size of around 0.8–11.2 μm (Fig. S4).

## VI. Stability: TGA curves

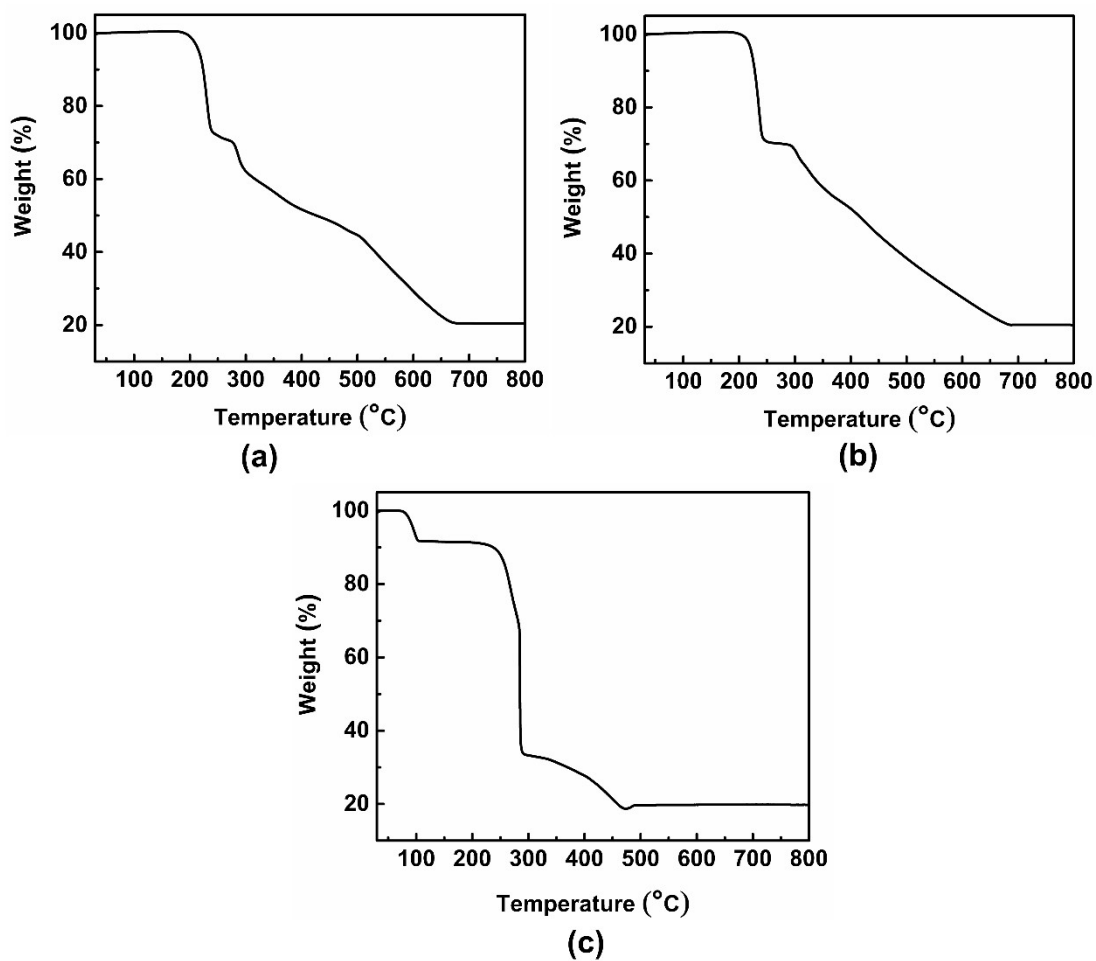

**Fig. S5** Thermogravimetric curves for Zn-pzdc-H<sub>3</sub>O<sup>+</sup> (a), Mn-pzdc-H<sub>3</sub>O<sup>+</sup> (b) and Cu-pzdc-H<sub>2</sub>O (c).

## VII. Stability: Nitrogen sorption measurements

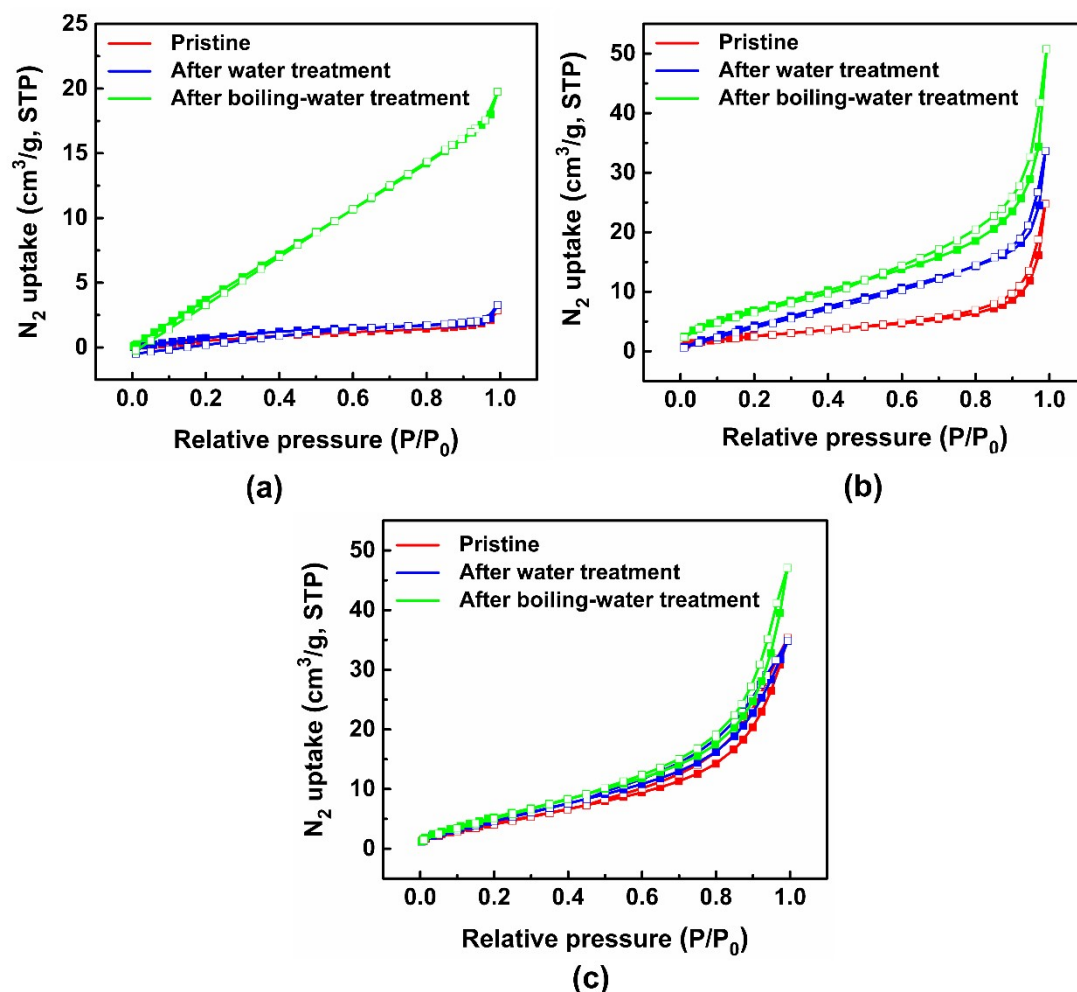

**Fig. S6** Nitrogen physisorption isotherms for **Zn-pzdc-H<sub>3</sub>O<sup>+</sup>** (a), **Mn-pzdc-H<sub>3</sub>O<sup>+</sup>** (b) and **Cu-Hpzdc-H<sub>2</sub>O** (c) at 77 K before and after water treatments.

The porosities of Zn-pzdc-H<sub>3</sub>O<sup>+</sup>, Mn-pzdc-H<sub>3</sub>O<sup>+</sup> and Cu-Hpzdc-H<sub>2</sub>O before and after treatments were examined by nitrogen sorption experiments at 77 K. All samples display the type-III gas adsorption behavior (Fig. S7), indicating that there is the weak interaction between adsorbent and adsorbate, i.e., the characteristics of non-porous materials. Furthermore, the pristine Zn-pzdc-H<sub>3</sub>O<sup>+</sup> and Zn-pzdc-H<sub>3</sub>O<sup>+</sup> samples treated with water and boiling water show the very small BET surface areas of 3.53, 4.68 and 30.63 m<sup>2</sup>/g, respectively, (Langmuir surface areas of 2.01, 2.72 and 31.70 m<sup>2</sup>/g, respectively), which illustrate that the adsorption properties may come from surface of the bulk materials but not the porosity. Like all Zn-pzdc-H<sub>3</sub>O<sup>+</sup> samples, all Mn-pzdc-H<sub>3</sub>O<sup>+</sup> and Cu-Hpzdc-H<sub>2</sub>O samples show the very similar results (Table S4). After water and boiling-water treatments, Zn-pzdc-H<sub>3</sub>O<sup>+</sup>, Mn-pzdc-H<sub>3</sub>O<sup>+</sup> and Cu-Hpzdc-H<sub>2</sub>O

samples exhibit the gradual trends in the surface areas. The results are related to the increase of the size of particles rather than the porous structures of materials, which results from the influence of the external environment and the operating condition, such as water, stirring and heating.

Table S4 BET and Langmuir surface areas of all samples before and after water treatments

| Sample                                | Type of surface area         | Pristine | After water treatment | After boiling water treatment |
|---------------------------------------|------------------------------|----------|-----------------------|-------------------------------|
| Zn-pzdc-H <sub>3</sub> O <sup>+</sup> | BET (m <sup>2</sup> /g)      | 3.53     | 4.68                  | 30.63                         |
|                                       | Langmuir (m <sup>2</sup> /g) | 2.01     | 2.72                  | 31.70                         |
| Mn-pzdc-H <sub>3</sub> O <sup>+</sup> | BET (m <sup>2</sup> /g)      | 10.41    | 25.07                 | 29.72                         |
|                                       | Langmuir (m <sup>2</sup> /g) | 10.40    | 19.26                 | 26.67                         |
| Cu-Hpzdc-H <sub>2</sub> O             | BET (m <sup>2</sup> /g)      | 19.39    | 22.56                 | 24.88                         |
|                                       | Langmuir (m <sup>2</sup> /g) | 15.01    | 16.01                 | 17.75                         |

## VIII. Stability: IR spectra

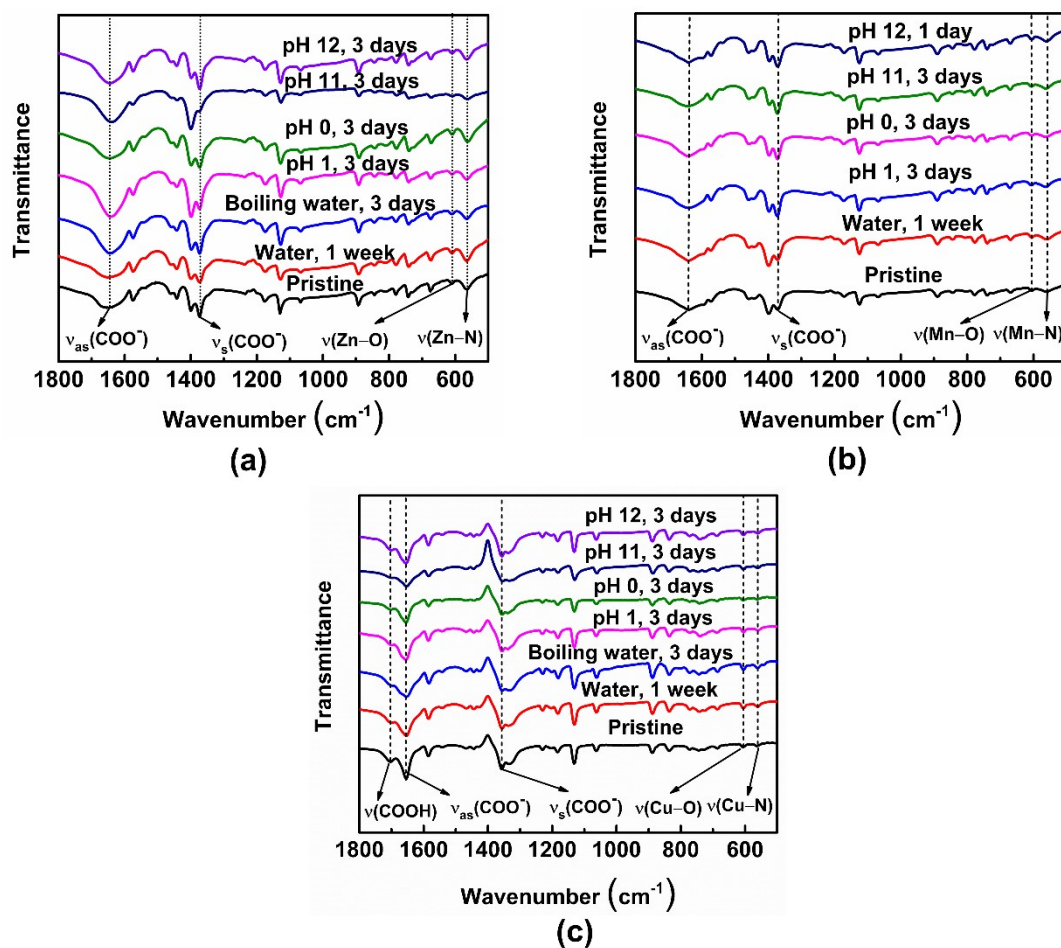

**Fig. S7** IR spectra for  $\text{Zn-pzdc-H}_3\text{O}^+$  (a),  $\text{Mn-pzdc-H}_3\text{O}^+$  (b) and  $\text{Cu-Hpzdc-H}_2\text{O}$  (c) before and after treatments (performed on a Nicolet 5700 FT-IR spectrometer).

## IX. Stability: PXRD pattern and IR spectrum of Mn-pzdc-H<sub>3</sub>O<sup>+</sup> after being treated with boiling water

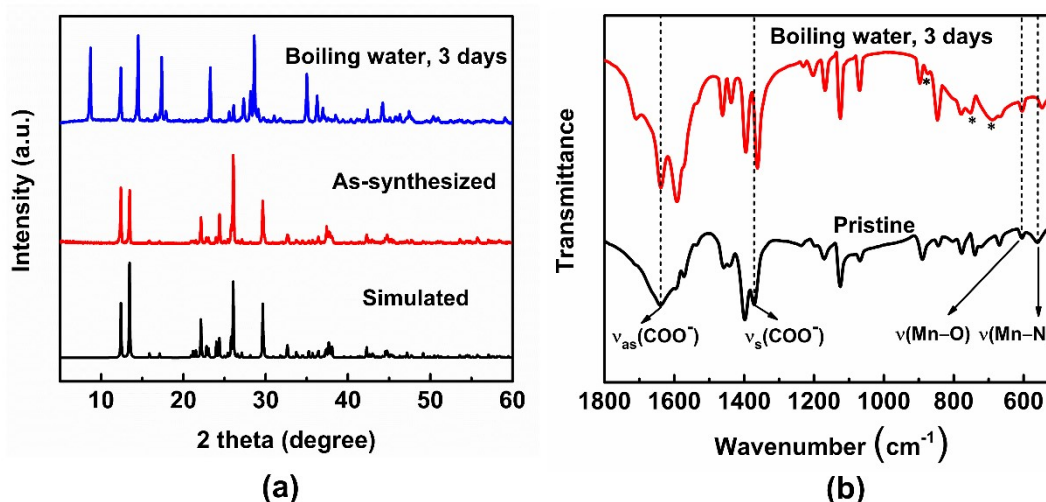

**Fig. S8** PXRD pattern (a) and IR spectrum (b) for Mn-pzdc-H<sub>3</sub>O<sup>+</sup> upon immersion of boiling water for 3 days.

After being treated with boiling water for 3 days, Mn-pzdc-H<sub>3</sub>O<sup>+</sup> shows some peaks identical to the pristine one and some new unidentified peaks in the PXRD pattern. The above result demonstrates that Mn-pzdc-H<sub>3</sub>O<sup>+</sup> partially maintains its structural integrity and partially undergoes phase transitions to form new crystalline structures rather than structural collapse. In the IR spectrum, boiling-water-treated Mn-pzdc-H<sub>3</sub>O<sup>+</sup> exhibits most unaltered peaks (such as 1639 cm<sup>-1</sup> for  $\nu_{as}(\text{COO}^-)$  and 605 cm<sup>-1</sup> for  $\nu(\text{Mn-O})$ ), a few changed peaks (just a shift of peak position, 1362 cm<sup>-1</sup> for  $\nu_s(\text{COO}^-)$  and 548 cm<sup>-1</sup> for  $\nu(\text{Mn-N})$ ), and a few new peaks (denoted as \*, 874, 752 and 689 cm<sup>-1</sup>). These unchanged and changed peaks indicate that there exist coordination bonds in the boiling-water-treated sample and the bond lengths are changed only. Some new peaks are possibly associated with the change of coordination bond length, which leads to different vibrations in the aromatic ring. Meanwhile, the change in coordination bond length is likely to be related to the generation of new crystalline phases. It is perhaps that the new crystalline phases correspond to more-stable states compared to the pristine Mn-pzdc-H<sub>3</sub>O<sup>+</sup> sample.<sup>4</sup>

## X. Water adsorption–desorption isotherms

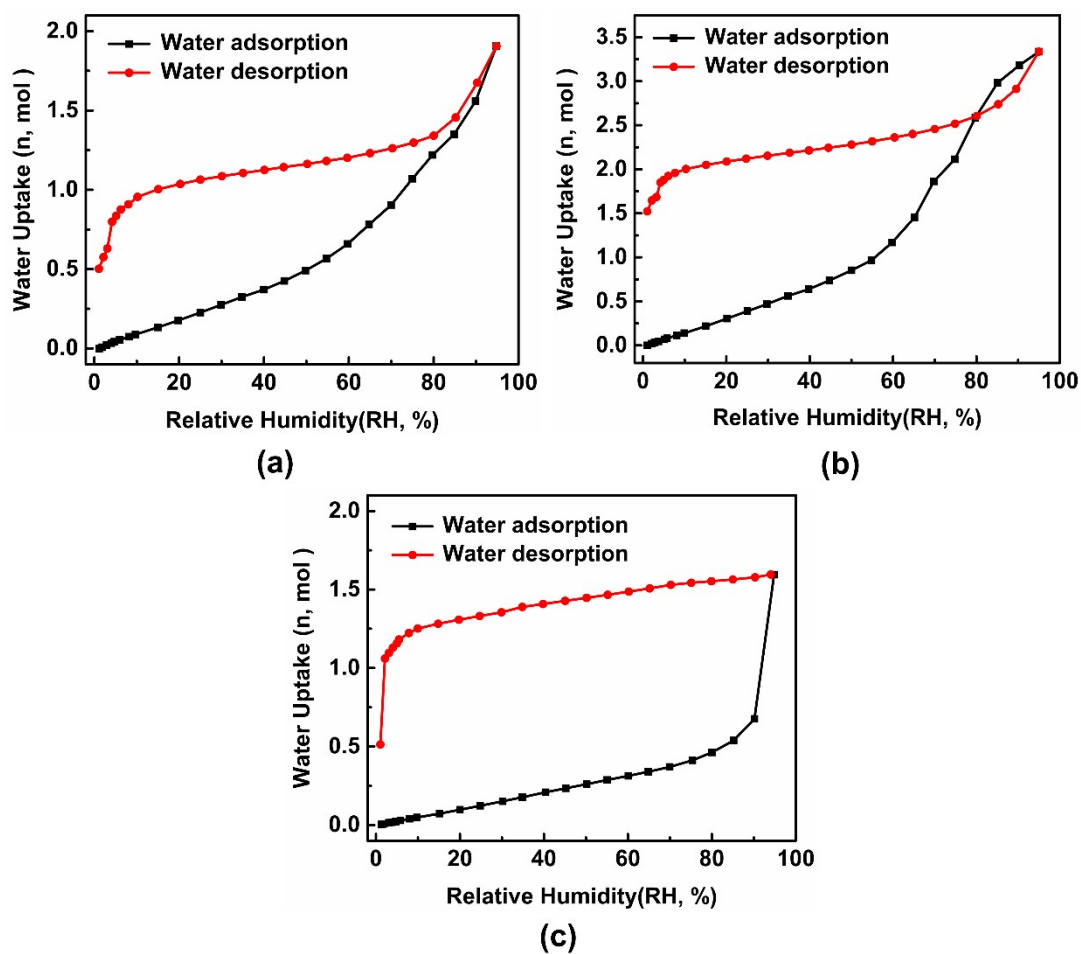

**Fig. S9** Water adsorption–desorption isotherms of Zn-pzdc-H<sub>3</sub>O<sup>+</sup> (a), Mn-pzdc-H<sub>3</sub>O<sup>+</sup> (b) and Cu-Hpzdc-H<sub>2</sub>O (c) at 298 K.

## XI. Electrochemical measurements: impedance spectra

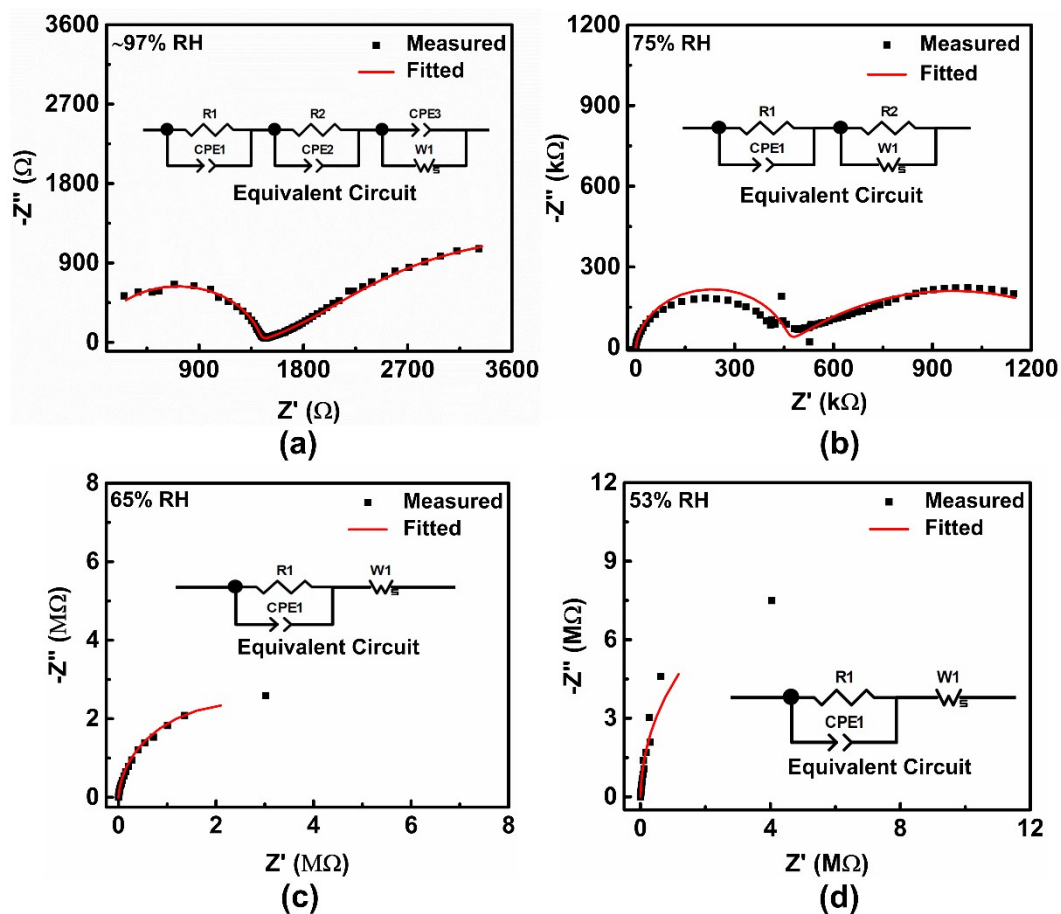

**Fig. S10** Nyquist plots of Zn-pzdc-H<sub>3</sub>O<sup>+</sup> at different RH (relative humidity) and 298 K (R1, bulk resistor; R2, grain boundary resistor; CPE, constant phase element; W1, Warburg diffusion element).



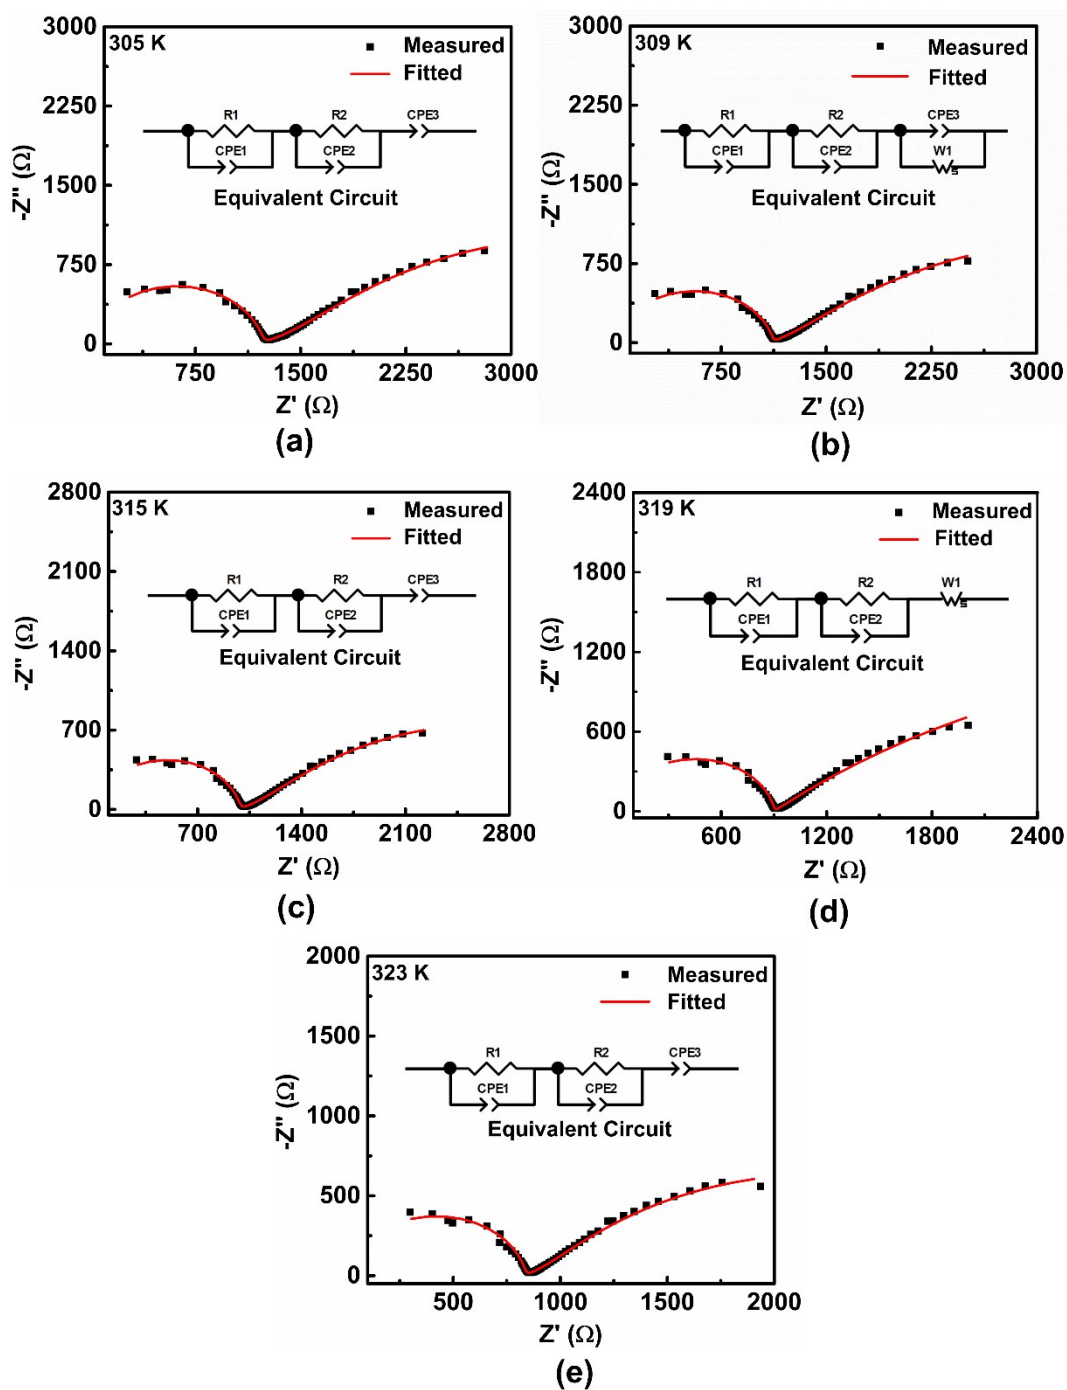

**Fig. S11** Nyquist plots of  $\text{Zn-pzdc-H}_3\text{O}^+$  at different temperatures and  $\sim 97\%$  RH (relative humidity) (R1, bulk resistor; R2, grain boundary resistor; CPE, constant phase element; W1, Warburg diffusion element).

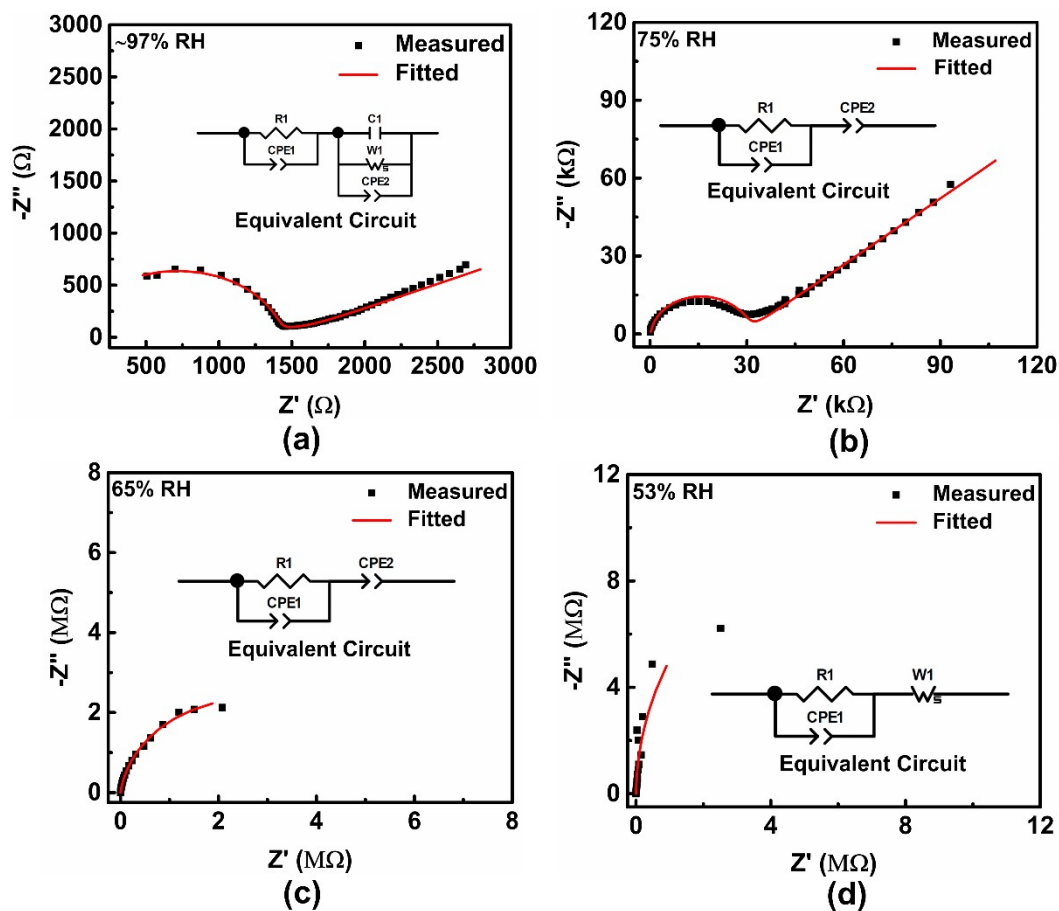

**Fig. S12** Nyquist plots of  $\text{Mn-pzdc-H}_3\text{O}^+$  at different RH (relative humidity) and 298 K ( $R_1$ , bulk resistor; CPE, constant phase element;  $C_1$ , capacitor;  $W_1$ , Warburg diffusion element).

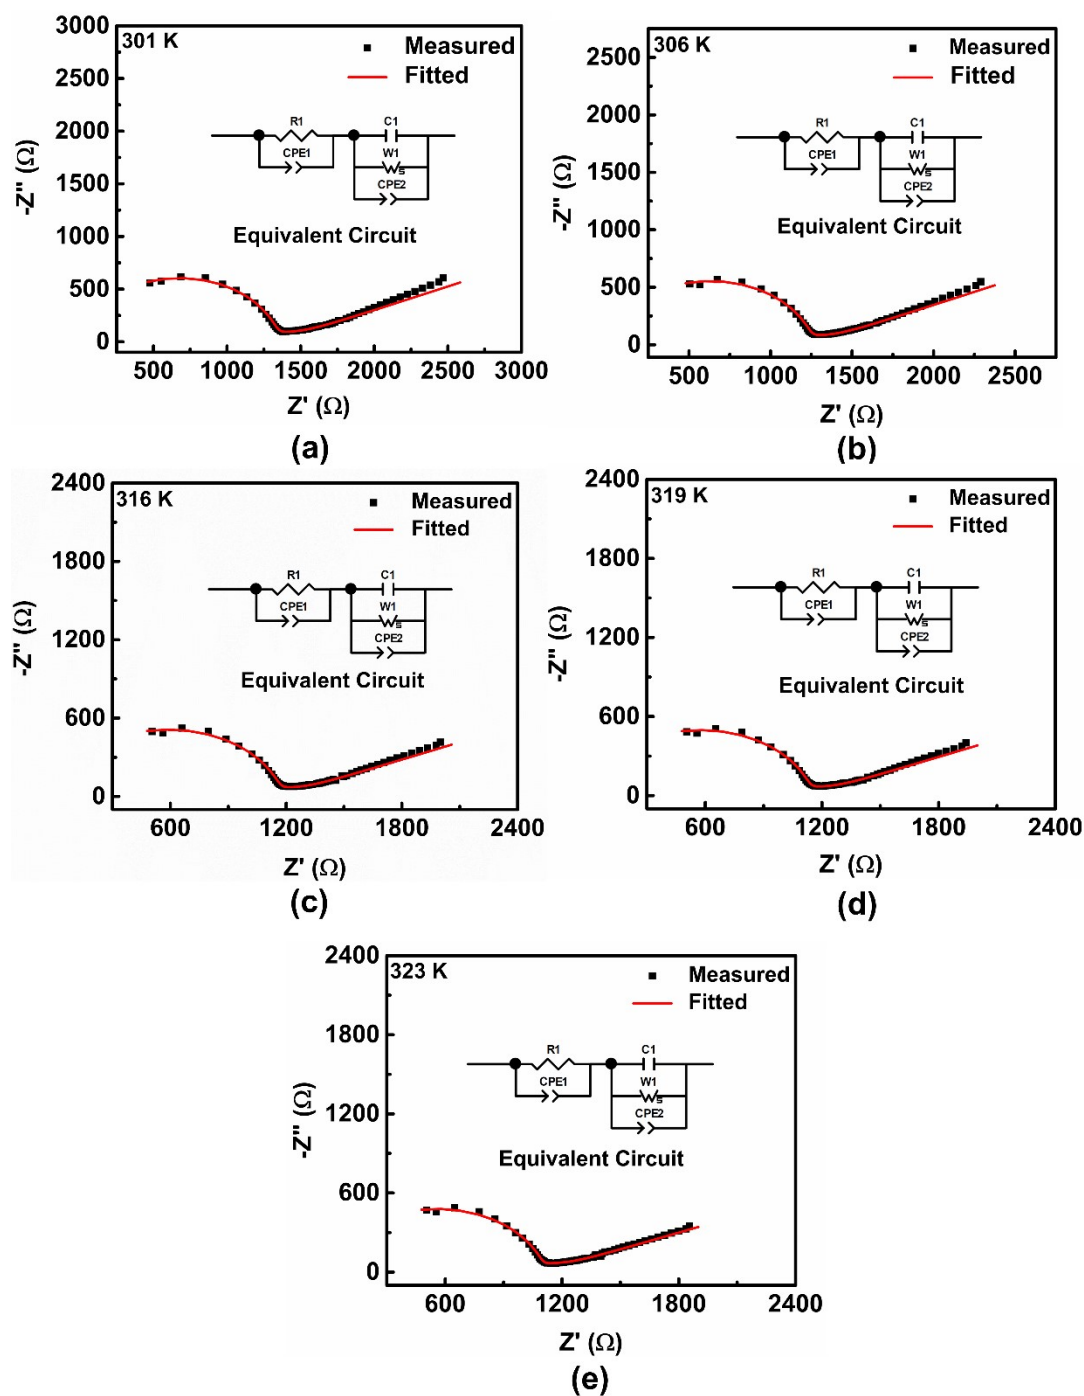

**Fig. S13** Nyquist plots of  $\text{Mn-pzdc-H}_3\text{O}^+$  at different temperatures and  $\sim 97\%$  RH (relative humidity) ( $R_1$ , bulk resistor; CPE, constant phase element;  $C_1$ , capacitor;  $W_1$ , Warburg diffusion element).

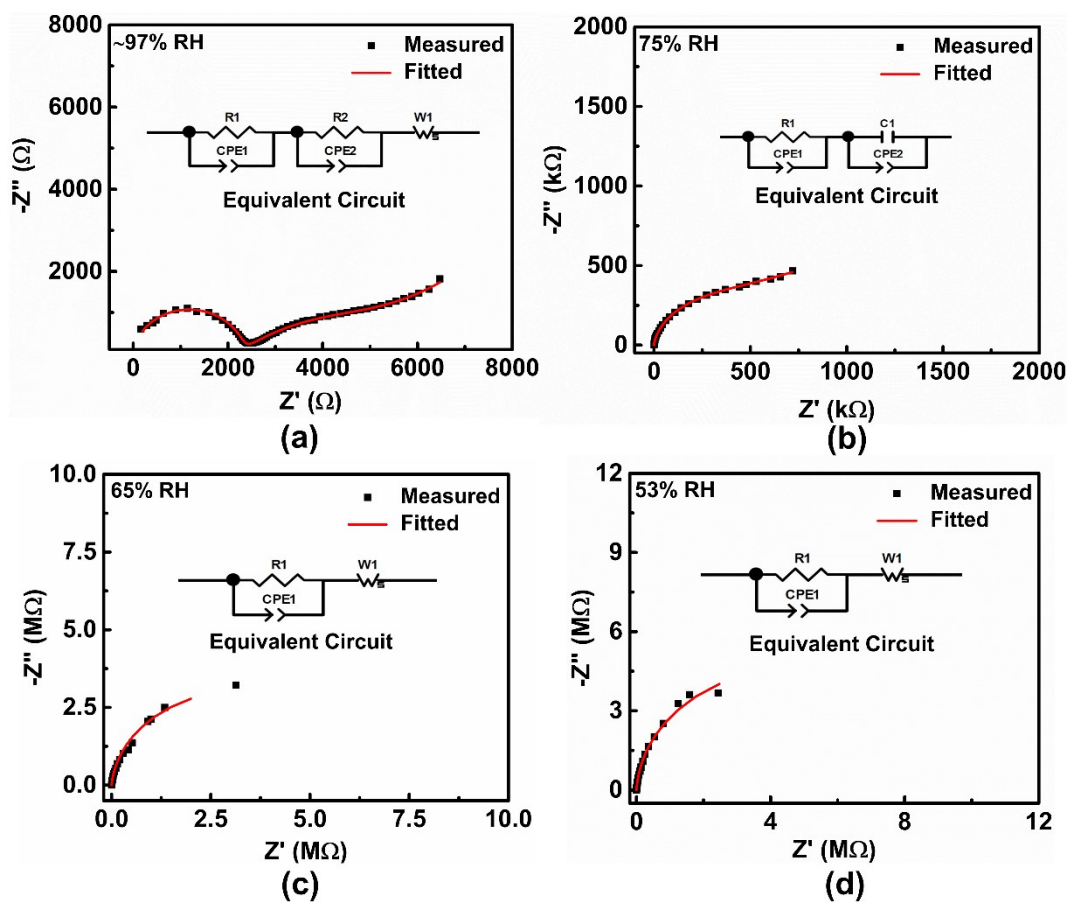

**Fig. S14** Nyquist plots of Cu-Hpzdc-H<sub>2</sub>O at different RH (relative humidity) and 298 K ( $R_1$ , bulk resistor;  $R_2$ , grain boundary resistor; CPE, constant phase element;  $C_1$ , capacitor;  $W_1$ , Warburg diffusion element).

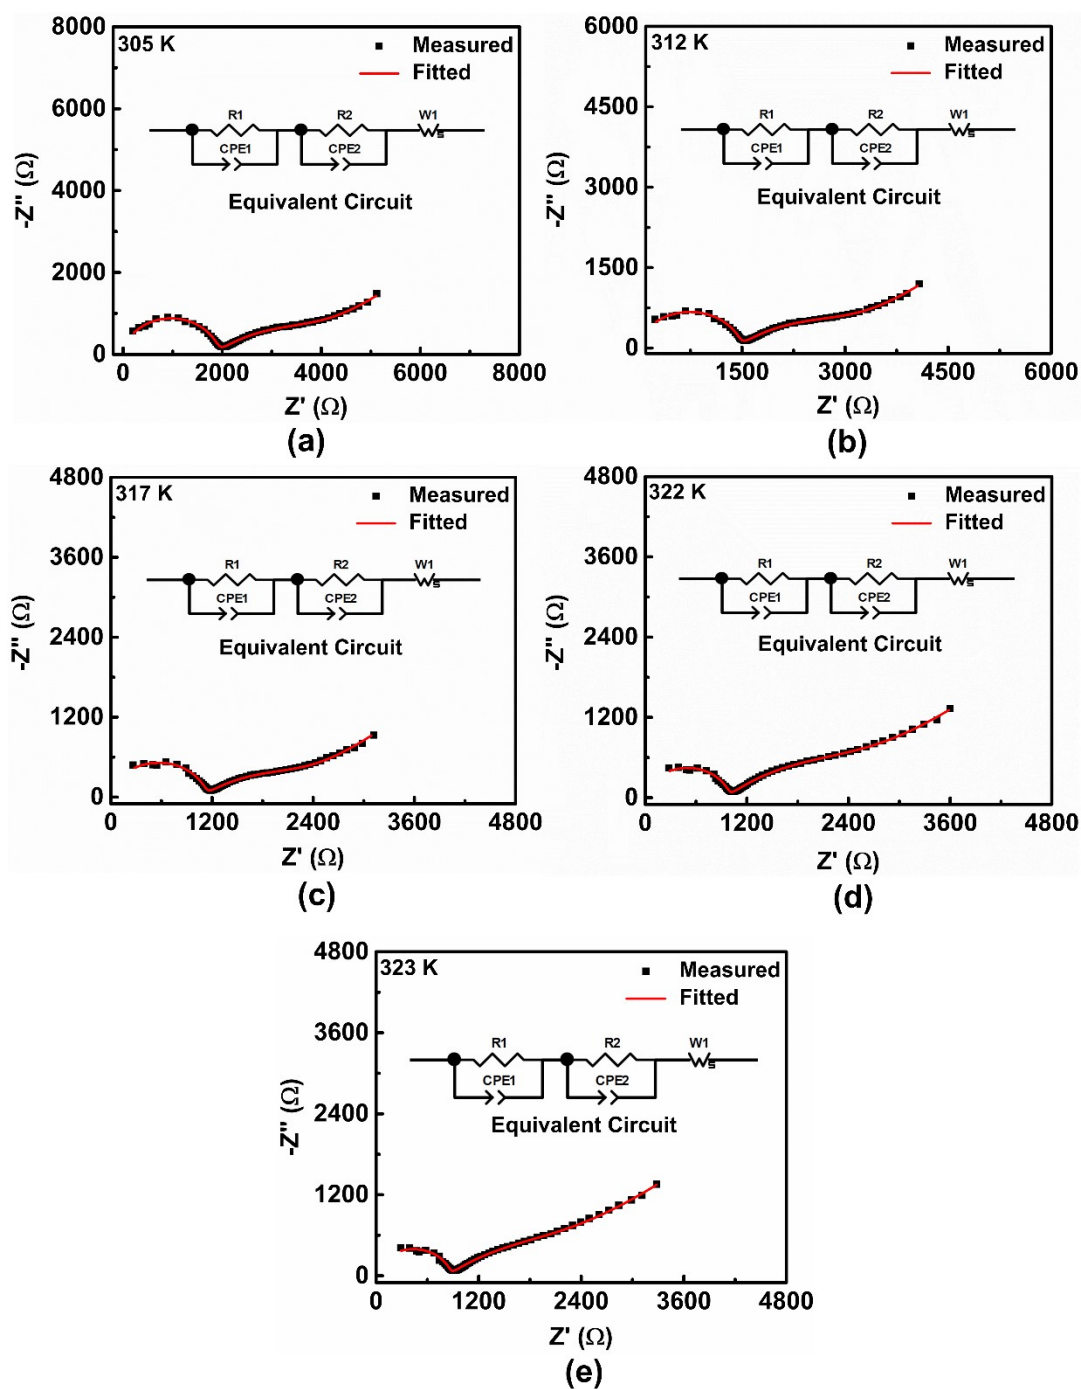

**Fig. S15** Nyquist plots of Cu-Hpzdc-H<sub>2</sub>O at different temperatures and ~97% RH (relative humidity) (R1, bulk resistor; R2, grain boundary resistor; CPE, constant phase element; W1, Warburg diffusion element).

## XII. PXRD patterns after impedance measurements.

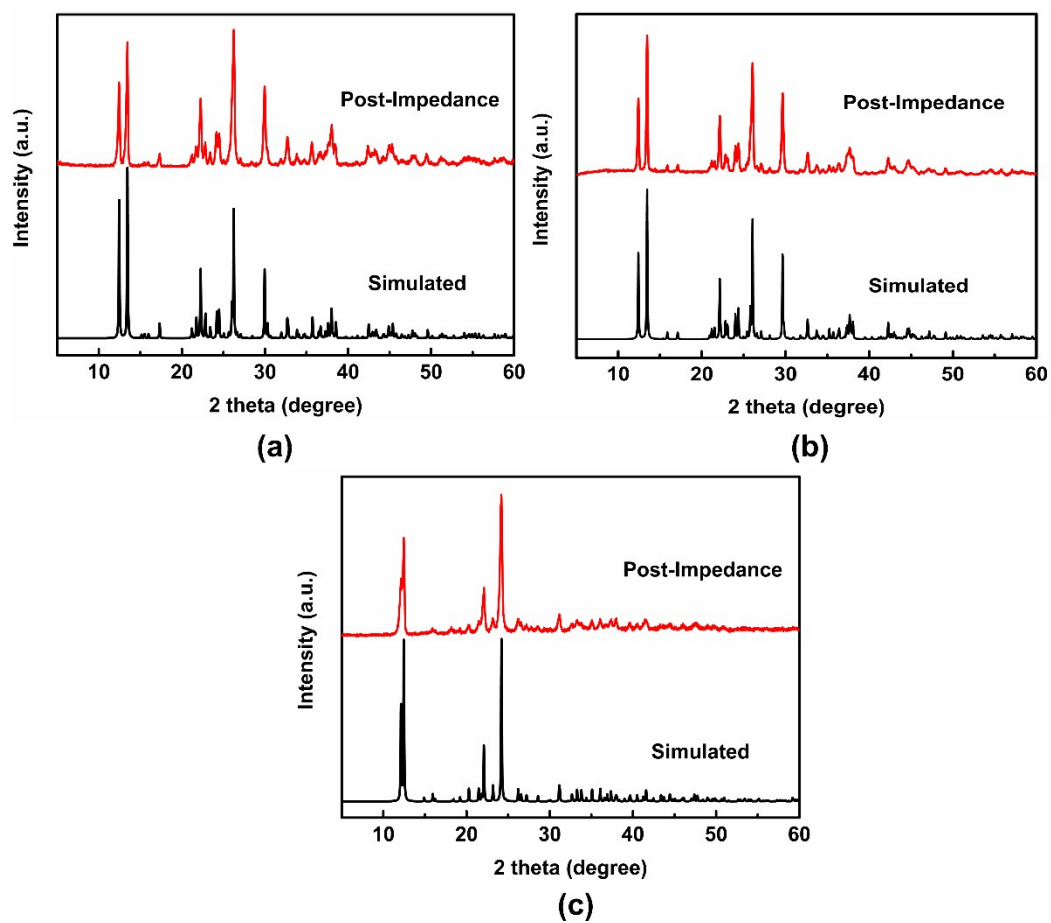

**Fig. S16** (a) PXRD patterns of simulations based on single-crystal analysis and after the impedance measurements for **Zn-pzdc-H<sub>3</sub>O<sup>+</sup>** (a), **Mn-pzdc-H<sub>3</sub>O<sup>+</sup>** (b) and **Cu-Hpzdc-H<sub>2</sub>O** (c) (at ~97% RH and 298–323 K).

### XIII. Comparison of chemical stability

Table S5 Comparison of chemical stability of Zn-pzdc-H<sub>3</sub>O<sup>+</sup>, Mn-pzdc-H<sub>3</sub>O<sup>+</sup> and Cu-Hpzdc-H<sub>2</sub>O with reported MOF materials.

| Materials                                                                                                                                                                                                               | pH range   | Time<br>(day or hour) | References |
|-------------------------------------------------------------------------------------------------------------------------------------------------------------------------------------------------------------------------|------------|-----------------------|------------|
| Zn-pzdc-H <sub>3</sub> O <sup>+</sup>                                                                                                                                                                                   | 0–12       | 3 days                | This work  |
| Cu-Hpzdc-H <sub>2</sub> O                                                                                                                                                                                               | 0–12       | 3 days                | This work  |
| Mn-pzdc-H <sub>3</sub> O <sup>+</sup>                                                                                                                                                                                   | 0–11<br>12 | 3 days<br>1 day       | This work  |
| MIP-202(Zr) <sup>[a]</sup>                                                                                                                                                                                              | 0–12       | –                     | 5          |
| PCN-230                                                                                                                                                                                                                 | 0–12       | 12 hours              | 6          |
| PCN-225                                                                                                                                                                                                                 | 0–12       | 12 hours              | 7          |
| [H <sub>2</sub> en] <sub>4</sub> [Ni <sub>5</sub> (OH) <sub>3</sub> (trzS) <sub>3</sub> (en)(H <sub>2</sub> O)(B-α-PW <sub>9</sub> O <sub>34</sub> )]·6H <sub>2</sub> O <sup>[b]</sup>                                  | 2–12       | 48 hours              | 8          |
| [Cu <sub>3</sub> (μ <sub>3</sub> -OH)(H <sub>2</sub> O) <sub>3</sub> (atz) <sub>3</sub> ][P <sub>2</sub> W <sub>18</sub> O <sub>62</sub> ]·14H <sub>2</sub> O <sup>[c]</sup>                                            | 2–12       | 20 hours              | 9          |
| Cu <sub>6</sub> (trz) <sub>10</sub> (H <sub>2</sub> O) <sub>4</sub> [H <sub>2</sub> SiW <sub>12</sub> O <sub>40</sub> ]·8H <sub>2</sub> O <sup>[d]</sup>                                                                | 2–12       | 24 hours              | 10         |
| [Zn <sub>12</sub> (trz) <sub>20</sub> ][SiW <sub>12</sub> O <sub>40</sub> ]·11H <sub>2</sub> O <sup>[e]</sup>                                                                                                           | 2–13       | 24 hours              | 11         |
| {[Cu <sup>I</sup> <sub>3</sub> Cu <sup>II</sup> <sub>3</sub> L <sub>3</sub> (DMF) <sub>2</sub> (CH <sub>3</sub> OH)(H <sub>2</sub> O)]·3CH <sub>3</sub> OH} <sub>n</sub> <sup>[f]</sup>                                 | 1–9        | 1 day                 | 12         |
| [Ni <sub>3</sub> (HL) <sub>2</sub> (H <sub>2</sub> O) <sub>10</sub> ]·4H <sub>2</sub> O <sup>[g]</sup>                                                                                                                  | 1.99–6.23  | 4 days                | 13         |
| [Eu <sub>20</sub> (PDC) <sub>12</sub> (SO <sub>4</sub> ) <sub>12</sub> (μ <sub>2</sub> -OH) <sub>3</sub> (μ <sub>2</sub> -H <sub>2</sub> O) <sub>3</sub> (H <sub>2</sub> O) <sub>36</sub> ] <sub>n</sub> <sup>[h]</sup> | 2–13       | 12 hours              | 14         |
| Zn <sub>3</sub> (IBT) <sub>2</sub> (H <sub>2</sub> O) <sub>2</sub> <sup>[i]</sup>                                                                                                                                       | 2–12       | 24 hours              | 15         |
| {[Sr(o-CPhH <sub>2</sub> IDC)(H <sub>2</sub> O) <sub>2</sub> ]·2H <sub>2</sub> O} <sub>n</sub> <sup>[g]</sup>                                                                                                           | 1–11       | 1 day                 | 16         |
| [FcCO-(CH <sub>2</sub> ) <sub>2</sub> COOH] <sup>[k]</sup>                                                                                                                                                              | 1–6        | 24 hours              | 17         |
| Ni <sub>3</sub> (BTP) <sub>2</sub> <sup>[l]</sup>                                                                                                                                                                       | 2–14       | 14 days               | 18         |
| UiO-66-NO <sub>2</sub> <sup>[m]</sup>                                                                                                                                                                                   | 1–14       | 2 hours               | 19         |
| [(CH <sub>3</sub> ) <sub>2</sub> NH <sub>2</sub> ] <sub>2</sub> [Eu <sub>6</sub> (μ <sub>3</sub> -OH) <sub>8</sub> (1,4-NDC) <sub>6</sub> (H <sub>2</sub> O) <sub>6</sub> ] <sup>[n]</sup>                              | 3.5–10     | 24 hours              | 20         |

<sup>[a]</sup> Ligand = L-aspartic acid. <sup>[b]</sup> en = ethylenediamine, H<sub>2</sub>trzS = 1H-1,2,4-triazole-3-thiol. <sup>[c]</sup> Hatz = 3-amino-1,2,4-triazolate. <sup>[d]</sup> <sup>[e]</sup> Trz = 1,2,4-triazole. <sup>[f]</sup> H<sub>3</sub>L = [3-(4-methyl-benzoyl)-thioureido]-acetic acid. <sup>[g]</sup> H<sub>4</sub>L = 4-F-C<sub>6</sub>H<sub>4</sub>CH<sub>2</sub>N(CH<sub>2</sub>PO<sub>3</sub>H<sub>2</sub>)<sub>2</sub>. <sup>[h]</sup> H<sub>3</sub>PDC = 3,5-pyrazoledicarboxylic acid. <sup>[i]</sup> 4,5-bis(tetrazol-5-yl)imidazole. <sup>[j]</sup> o-CPhH<sub>4</sub>IDC = 2-(2-carboxylphenyl)-1H-imidazole-4,5-dicarboxylic acid. <sup>[k]</sup> Fc = (η<sup>5</sup>-C<sub>5</sub>H<sub>5</sub>)Fe(η<sup>5</sup>-C<sub>5</sub>H<sub>4</sub>). <sup>[l]</sup> H<sub>3</sub>BTP = 1,3,5-tris(1H-pyrazol-4-yl)benzene. <sup>[m]</sup> Ligand = 2-nitro-benzenedicarboxylic acid. <sup>[n]</sup> 1,4-NDC = 1,4-naphthalenedicarboxylate.

## XIV. Comparison of proton conductivity

Table S6 Comparison of proton conductivity of Zn-pzdc-H<sub>3</sub>O<sup>+</sup>, Mn-pzdc-H<sub>3</sub>O<sup>+</sup> and Cu-Hpzdc-H<sub>2</sub>O with some reported proton conductors.

| Materials                                                                                                                                                                                                                                                                             | Proton Conductivity (S/cm) | Activation Energy (eV) | Temperature (K) | RH (%) | References |
|---------------------------------------------------------------------------------------------------------------------------------------------------------------------------------------------------------------------------------------------------------------------------------------|----------------------------|------------------------|-----------------|--------|------------|
| Zn-pzdc-H <sub>3</sub> O <sup>+</sup>                                                                                                                                                                                                                                                 | 2.42×10 <sup>-3</sup>      | 0.21                   |                 |        |            |
| Mn-pzdc-H <sub>3</sub> O <sup>+</sup>                                                                                                                                                                                                                                                 | 2.03×10 <sup>-3</sup>      | 0.10                   | 323             | ~97    | This Work  |
| Cu-Hpzdc-H <sub>3</sub> O                                                                                                                                                                                                                                                             | 1.68×10 <sup>-3</sup>      | 0.35                   |                 |        |            |
| [Pb <sub>2</sub> (L)(H <sub>2</sub> O)] <sup>[a]</sup>                                                                                                                                                                                                                                | 6.61×10 <sup>-4</sup>      | 0.21                   | 323             | 98     | 21         |
| [Ni <sub>2</sub> (H <sub>2</sub> L) <sub>2</sub> (bpyBr) <sub>2</sub> (H <sub>2</sub> O) <sub>3</sub> ] <sub>n</sub> /Nafion <sup>[b]</sup>                                                                                                                                           | 7.43×10 <sup>-7</sup>      | 0.159                  | 333             | –      | 22         |
| [Eu <sub>2</sub> (HBDPP) <sub>2</sub> (H <sub>2</sub> O) <sub>2</sub> (DMF) <sub>2</sub> ](H <sub>2</sub> O) <sub>2</sub> <sup>[c]</sup>                                                                                                                                              | 4.53 × 10 <sup>-4</sup>    | 0.17<br>0.42           | 348             | 98     | 23         |
| [Zn(L)Cl] <sub>n</sub> <sup>[d]</sup>                                                                                                                                                                                                                                                 | 1.16×10 <sup>-3</sup>      | 0.37<br>0.42           | 343             | 98     | 24         |
| {[Co <sub>2</sub> (AHP) <sub>5</sub> (DMA) <sub>2</sub> ](1,5-NDS) <sub>2</sub> (DMA) <sub>2</sub> (H <sub>2</sub> O) <sub>3</sub> (S)} <sup>[e]</sup>                                                                                                                                | 1.93 × 10 <sup>-3</sup>    | 0.21                   | 363             | 98     | 25         |
| [Zn( <i>p</i> -IPhHIDC)] <sub>n</sub> <sup>[f]</sup>                                                                                                                                                                                                                                  | 1.9 × 10 <sup>-3</sup>     | 0.64                   | 373             | 98     | 26         |
| [Co(PPA) <sub>2</sub> (BDC)(H <sub>2</sub> O) <sub>2</sub> ·(PPA) <sub>2</sub> (H <sub>2</sub> BDC) <sub>2</sub> (H <sub>2</sub> O)] <sup>[g]</sup>                                                                                                                                   | 1.20×10 <sup>-4</sup>      | 0.24                   | 298             | ~97    | 27         |
| (H <sub>2</sub> L <sub>2</sub> ) <sub>0.5</sub> [(Cu <sup>II</sup> L <sub>2</sub> ) <sub>2</sub> (PMO <sub>12</sub> O <sub>40</sub> )]·H <sub>2</sub> O <sup>[h]</sup>                                                                                                                | 1.9×10 <sup>-4</sup>       | 0.43                   | 338             | 95     | 28         |
| Mn(C <sub>2</sub> O <sub>4</sub> )(C <sub>12</sub> H <sub>14</sub> N <sub>6</sub> O <sub>2</sub> ) <sup>[i]</sup>                                                                                                                                                                     | 1.1 × 10 <sup>-4</sup>     | 0.41                   | 298             | 98     | 29         |
| [Bi <sub>4</sub> (HAzoBTC) <sub>2</sub> (AzoBTC)(OH) <sub>2</sub> (H <sub>2</sub> O) <sub>4</sub> ] <sub>n</sub> ·7H <sub>2</sub> O <sup>[j]</sup>                                                                                                                                    | 1.0 × 10 <sup>-4</sup>     | –                      | 353             | 80     | 30         |
| UMOM-100-b <sup>[k]</sup>                                                                                                                                                                                                                                                             | 2.11 × 10 <sup>-4</sup>    | 0.66                   | 353             | 90     | 31         |
| [Cu <sub>4</sub> (S,S or R,R-LOH) <sub>3</sub> (NO <sub>3</sub> ) <sub>3</sub> ·3H <sub>2</sub> O] <sub>n</sub> <sup>[l]</sup>                                                                                                                                                        | 0.64 × 10 <sup>-4</sup>    | 0.34                   | 298             | 97     | 32         |
| (R)-[Ni(pemp)(H <sub>2</sub> O) <sub>2</sub> ] <sup>[m]</sup>                                                                                                                                                                                                                         | 1.61 × 10 <sup>-4</sup>    | 0.24                   | 298             | 95     | 33         |
| {[Cu(H <sub>2</sub> L)(H <sub>2</sub> O) <sub>2</sub> ] <sub>2</sub> [PW <sub>12</sub> O <sub>40</sub> ]} <sub>n</sub> {[Cu(HL)(H <sub>2</sub> O) <sub>2</sub> ] <sub>2</sub> [PW <sub>12</sub> O <sub>40</sub> ]} <sub>n</sub> ·4CH <sub>3</sub> OH·4H <sub>2</sub> O <sup>[n]</sup> | 1.05 × 10 <sup>-4</sup>    | 0.16                   | 298             | 98     | 34         |
| {Cd <sub>2</sub> (D-pmpcH)(H <sub>2</sub> O) <sub>2</sub> Cl <sub>2</sub> } <sub>n</sub> <sup>[o]</sup>                                                                                                                                                                               | 1.38 × 10 <sup>-4</sup>    | 0.14                   | 323             | ~97    | 35         |
| Mg-BPTC <sup>[p]</sup>                                                                                                                                                                                                                                                                | 2.60 × 10 <sup>-4</sup>    | 0.47, 1.18             | 373             | 98     | 36         |
| {[Co <sub>3</sub> ( <i>p</i> -ClPhHIDC) <sub>3</sub> ]                                                                                                                                                                                                                                | 2.47 × 10 <sup>-4</sup>    | 0.20                   | 363             | 93     | 37         |



|                                                                                                                                                             |                       |      |     |     |    |
|-------------------------------------------------------------------------------------------------------------------------------------------------------------|-----------------------|------|-----|-----|----|
| $(\text{H}_2\text{O})_3] \cdot 6\text{H}_2\text{O}\}_n$ <sup>[q]</sup>                                                                                      |                       |      |     |     |    |
| Co( <i>m</i> -BrPhIDC) <sub>2</sub><br>(H <sub>2</sub> O) <sub>6</sub> ] · 2H <sub>2</sub> O <sup>[r]</sup>                                                 | $0.76 \times 10^{-4}$ | 0.56 | 373 | 98  | 38 |
| {[Eu <sub>3</sub> (bpydb) <sub>3</sub> (HCOO)(OH) <sub>2</sub> (DMF)] · 3DMF · xH <sub>2</sub> O} <sub>n</sub> <sup>[s]</sup>                               | $1.7 \times 10^{-4}$  | 0.63 | 325 | 98  | 39 |
| {[Er <sub>3</sub> (pmpc)(C <sub>2</sub> O <sub>4</sub> ) <sub>3</sub> (H <sub>2</sub> O) <sub>7</sub> ]<br>· 2H <sub>2</sub> O} <sub>n</sub> <sup>[t]</sup> | $0.81 \times 10^{-4}$ | 0.33 | 298 | ~97 | 40 |
| PA@Tp-Stb <sup>[u]</sup>                                                                                                                                    | $2.3 \times 10^{-5}$  | –    | 332 | 98  | 41 |
| (H <sub>12</sub> RCC1) <sup>12+</sup> · 6(SO <sub>4</sub> ) <sup>2-</sup><br>· 27.25(H <sub>2</sub> O) <sup>[v]</sup>                                       | $0.61 \times 10^{-4}$ | 0.10 | 303 | 95  | 42 |
| CB[8] · 6.8HCO <sub>2</sub> H · 13H <sub>2</sub> O<br><sub>[w]</sub>                                                                                        | $1.3 \times 10^{-4}$  | 0.56 | 298 | 98  | 43 |
| [(H <sub>3</sub> betc)(H-Hopip) <sub>0.5</sub> · (H <sub>2</sub> O)] <sup>[x]</sup>                                                                         | $1.34 \times 10^{-4}$ | 0.41 | 298 | ~97 | 44 |
| GINZH <sup>[y]</sup>                                                                                                                                        | $1.1 \times 10^{-4}$  | 0.20 | 307 | 98  | 45 |
| GISH <sup>[z]</sup>                                                                                                                                         | $2.0 \times 10^{-4}$  | 0.39 | 293 | 98  | 46 |

<sup>[a]</sup> H<sub>4</sub>L = biphenyl-3,3',5,5'-tetracarboxylic acid . <sup>[b]</sup> H<sub>4</sub>L = 5,5'-(butane-1,4-diylbis(oxy)) diisophthalic acid, and bpyBr = 4,4'-dibromo-2,2'-bipyridyl. <sup>[c]</sup> H<sub>4</sub>BDPP = 3,5-bis(3,5-dicarboxylphenyl)pyridine, and DMF = *N,N*-dimethylformamide. <sup>[d]</sup> HL = 2-(1-(carboxymethyl)-1H-benzo[d]imidazol-3-ium-3-yl)acetate. <sup>[e]</sup> AHP = 1,1'-(anthracene-9,10-diylbis(methylene))bis(pyridin-1-ium-4-olate, DMA = Dimethylacetamide and 1,5-NDS = 1,5-naphthalenedisulfonic acid.

<sup>[f]</sup> p-IPh<sub>3</sub>IDC = *p*-N-imidazol-1-yl-phenyl-1*H*-imidazole-4,5-dicarboxylic acid. <sup>[g]</sup> PPA = 4-(3-pyridinyl)-2-amino pyrimidine, H<sub>2</sub>BDC = 1,4-benzenedicarboxylic acid. <sup>[h]</sup> L2 = 1, 4-bis((1*H*-1,2,4-triazol-1-yl)methyl)-benzene. <sup>[i]</sup> C<sub>12</sub>H<sub>14</sub>N<sub>6</sub>O<sub>2</sub> = cyclic dipeptides generated by racemic histidine molecules. <sup>[j]</sup> H<sub>4</sub>AzoBTC = 3,3',5,5'-azobenzenetetracarboxylic acid. <sup>[k]</sup> UMOM-100-b = the incorporation of acid functionalized Cu(II)-based nanosized cuboctahedron MOP into a mesoporous MOF, PCN-777. <sup>[l]</sup> S,S or R,R-LOH = (S,S or R,R)-3,5-bis-(1-hydroxyethyl)-1,2,4-triazolate). <sup>[m]</sup> pemp<sup>2-</sup> = (R)-(1-phenylethylamino)-methylphosphonate. <sup>[n]</sup> H<sub>2</sub>L = 4,4'-bis(hydroxymethyl)-2,2'-bipyridine. <sup>[o]</sup> D-H<sub>3</sub>pmpc = (D)-1-(phosphono-methyl)piperidine-3-carboxylic acid. <sup>[p]</sup> H<sub>4</sub>BPTC = 2,2',6,6'- tetracarboxybiphenyl. <sup>[q]</sup> *p*-ClPh<sub>3</sub>IDC = 2-(*p*-chloro-phenyl)-imidazole-4,5-dicarboxylic acid. <sup>[r]</sup> *o*-BrPh<sub>3</sub>IDC = 2-(*o*-bromo-phenyl)-imidazole-4,5-dicarboxylic acid. <sup>[s]</sup> bpydbH<sub>2</sub> = 4,4'-(4,4'-bipyridine-2,6-diyl) dibenzoic acid, DMF = *N,N'*-dimethyl -formamide. <sup>[t]</sup> H<sub>3</sub>pmpc = 1-(phosphonomethyl)piperidine-3-carboxylic acid. <sup>[u]</sup> PA = loaded H<sub>3</sub>PO<sub>4</sub>, Tp = triformylphloroglucinol, Stb = 4,4'-diaminostilbene. <sup>[v]</sup> H<sub>12</sub>RCC1 = a porous organic cage material. <sup>[w]</sup> CB8 = cucurbit[8]uril. <sup>[x]</sup> H<sub>4</sub>betc = 1,2,4,5-benzenetetracarboxylic acid, Hopip = homopiperazine. <sup>[y]</sup> GINZH = a gallic acid-isoniazid cocrystal compound. <sup>[z]</sup> GISH = a hydrated sulfuric salt of gallic acid and isoniazid.

## XV. References for Supporting Information

- 1 M. Gryz, W. Starosta and J. Leciejewicz, *J. Coord. Chem.*, 2005, **58**, 931.
- 2 (a) J. Zou, Y. Wu, X. Wei, C. Duan, Y. Liu and Z. Xu, *Transition Met. Chem.*, 1998, **23**, 481; (b) L. Mao, S. J. Rettig, R. C. Thompson, J. Trotter and S. Xia, *Can. J. Chem.*, 1996, **74**, 433.
- 3 (a) F. Nepveu and M. H. Berkaoui, *Acta Cryst.*, 1993, **C49**, 1465; (b) L. Mao, S. J. Rettig, R. C. Thompson, J. Trotter and S. Xia, *Can. J. Chem.*, 1996, **74**, 2413.
- 4 A. Schneemann, V. Bon, I. Schwedler, I. Senkovska, S. Kaskel and R. A. Fischer, *Chem. Soc. Rev.*, 2014, **43**, 6062–6096.
- 5 S. Wang, M. Wahiduzzaman, L. Davis, A. Tissot<sup>1</sup>, W. Shepard, J. Marrot, C. Martineau-Corcoss, D. Hamdane, G. Maurin, S. D. -Vinot and C. Serre, *Nat. Commun.*, 2018, **9**, 4937.
- 6 T.-F. Liu, D. Feng, Y.-P. Chen, L. Zou, M. Bosch, S. Yuan, Z. Wei, S. Fordham, K. Wang and H.-C. Zhou, *J. Am. Chem. Soc.*, 2015, **137**, 413.
- 7 H.-L. Jiang, D. Feng, K. Wang, Z.-Y. Gu, Z. Wei, Y.-P. Chen and H.-C. Zhou, *J. Am. Chem. Soc.*, 2013, **135**, 13934.
- 8 G. J. Cao, J. D. Liu, T. T. Zhuang, X. H. Cai and S. T. Zheng, *Chem. Commun.*, 2015, **51**, 2048.
- 9 Y. Q. Jiao, H. Y. Zang, X. L. Wang, E. L. Zhou, B. Q. Song, C. G. Wang, K. Z. Shao and Z. M. Su, *Chem. Commun.*, 2015, **51**, 11313.
- 10 E. L. Zhou, C. Qin, P. Huang, X. L. Wang, W.C. Chen, K. Z. Shao and Z. M. Su, *Chem. Eur. J.*, 2015, **21**, 11894.
- 11 E. L. Zhou, C. Qin, X. L. Wang, K. Z. Shao and Z. M. Su, *Chem. Eur. J.*, 2015, **21**, 13058.
- 12 Z. B. Sun, Y. L. Li, Z. H. Zhang, Z. F. Li, B. Xiao and G. Li, *New J. Chem.*, 2019, **43**, 10637.
- 13 H. Xu, L. Feng, W. Huang, Q. Wang and H. Zhou, *New J. Chem.*, 2019, **43**, 807.
- 14 L. He, J. Kumar Nath, E. X. Chen, H.-D. Lai, S.-L. Huang and Q. Lin, *Chem. Commun.*, 2019, **55**, 2497.
- 15 C. Liu, N. Zhao, X. Zou and G. Zhu, *CrystEngComm*, 2018, **20**, 3158.
- 16 J. Feng, S. Yu, K. Guo, J. Li and G. Li, *Polyhedron*, 2019, **169**, 1.
- 17 Y. Qin, T. -L. Gao, W. -P. Xie, Z. Li, and G. Li, *ACS Appl. Mater. Interfaces*, 2019, **11**, 31018.
- 18 V. Colombo, S. Galli, H. J. Choi, G. D. Han, A. Maspero, G. Palmisano, N. Masciocchi and J. R. Long, *Chem. Sci.*, 2011, **2**, 1311.
- 19 M. Kandiah, M. H. Nilsen, S. Usseglio, S. Jakobsen, U. Olsbye, M. Tilset, C. Larabi, E. A. Quadrelli, F. Bonino and K. P. Lillerud, *Chem. Mater.*, 2010, **22**, 6632.
- 20 D.-X. Xue, Y. Belmabkhout, O. Shekhah, H. Jiang, K. Adil, A. J. Cairns and M. Eddaoudi, *J. Am. Chem. Soc.*, 2015, **137**, 5034.
- 21 X. Chen, Z. Zhang, J. Chen, S. Sapchenko, X. Han, I. da-Silva, M. Li, I. J. Vitorica-Yrezabal, G. Whitehead, C. C. Tang, K. Awaga, S. Yang and M. Schröder, *Chem. Commun.*, 2021, **57**, 65.

- 22 R. Li, H. Liu, C. Zhou, Z. Chu, J. Lu, S. Wang, W. Yan and J. Jin, *Inorg. Chem. Front.*, 2020, **7**, 1880.
- 23 S. -Fang Zhou, B. -B. Hao, T. Lin, C.-X. Zhang and Q.-L. Wang, *Dalton Trans.*, 2020, **49**, 14490.
- 24 Z.-Q. Shi, N.-N. Ji, M.-H. Wan, and G. Li, *Inorg. Chem.* 2020, **59**, 4781.
- 25 A. Mohanty, U. P. Singh, A. Ghorai, S. Banerjee and R. J. Butcher, *CrystEngComm*, 2021, **23**, 684.
- 26 Y. Qin, M. -H. Xue, B. -H. Dou, Z.-B. Sun and G. Li, *New J. Chem.*, 2020, **44**, 2741.
- 27 X. Liang, T. Cao, L. Wang, C. Zheng, Y. Zhao, F. Zhang, C. Wen, L. Feng and C. Wan, *CrystEngComm*, 2020, **22**, 1414.
- 28 K. Lu, A. L. Peláez, L. Wu, Y. Cao, C. Zhu, and H. Fu, *Inorg. Chem.*, 2019, **58**, 1794.
- 29 J. Shi, J. Li, H. Zeng, G. Zou, Q. Zhang and Z. Lin, *Dalton Trans.*, 2018, **47**, 15288.
- 30 S. M. F. Vilela, T. Devic, A. Várez, F. Salles and P. Horcajada, *Dalton Trans.*, 2019, **48**, 11181.
- 31 J. Lee, D. -W. Lim, S. Dekura, H. Kitagawa and W. Choe, *ACS Appl. Mater. Interfaces*, 2019, **11**, 12639.
- 32 B. Q. Song, D. Q. Chen, Z. Ji, J. Tang, X. L. Wang, H. Y. Zang and Z. M. Su, *Chem. Commun.*, 2017, **53**, 1892.
- 33 X. -G. Liu, S. -S. Bao, J. Huang, K. Otsubo, J. S. Feng, M. Ren, F. C. Hu, Z. Sun, L. M. Zheng, S. Wei and H. Kitagawa, *Chem. Commun.*, 2015, **51**, 15141.
- 34 H. Yang, X. Y. Duan, J. J. Lai, Y. Zhao, X. J. Wang and M. L. Wei, *Inorg. Chem.*, 2019, **58**, 446.
- 35 X. Liang, K. Cai, F. Zhang, J. Liu and G. Zhu, *CrystEngComm*, 2017, **19**, 6325.
- 36 X. Y. Dong, X. P. Hu, H. C. Yao, S. Q. Zang, H. W. Hou and T. C. W. Mak, *Inorg. Chem.*, 2014, **53**, 12050.
- 37 X. Liang, B. Li, M. H. Wang, J. Wang, R. L. Liu and G. Li, *ACS Appl. Mater. Interfaces.*, 2017, **9**, 25082.
- 38 R. L. Liu, L. L. Zhao, W. Dai, C. L. Yang and G. Li, *Inorg. Chem.*, 2018, **57**, 1474.
- 39 S. L. Yang, P. P. Sun, Y. Y. Yuan, C. X. Zhang and Q. L. Wang, *CrystEngComm*, 2018, **20**, 3066.
- 40 X. Liang, K. Cai, F. Zhang, J. Liu and G. Zhu, *J. Mater. Chem. A*, 2017, **5**, 25350.
- 41 S. Chandra, T. Kundu, S. Kandambeth, R. BabaRao, Y. Marathe, S. M. Kunjir, and R. Banerjee, *J. Am. Chem. Soc.*, 2014, **136**, 6570.
- 42 M. Liu, L. Chen, S. Lewis, S. Y. Chong, M. A. Little, T. Hasell, I. M. Aldous, C. M. Brown, M. W. Smith, C. A. Morrison, L. J. Hardwick and A. I. Cooper, *Nat. Comm.* 2016, **7**, 12750.
- 43 M. Yoon, K. Suh, H. Kim, Y. Kim, N. Selvapalam and K. Kim, *Angew. Chem., Int. Ed.*, 2011, **50**, 7870.
- 44 X. Liang, Y. Chen, L. Wang, F. Zhang, Z. Fan, T. Cao, Y. Cao, H. Zhu, X. He, B. Deng, Y. You, Y. Dong and Y. Zhao, *New J. Chem.*, 2019, **43**, 11099.
- 45 R. Kaur, B. Ponraj, D. Swain, K. B. R. Varma and T. N. G. Row, *Cryst. Growth Des.*, 2015, **15**, 4171.

46 R. Kaur, D. Swain, D. Dutta, K. Brajesh, P. Singh, A. J. Bhattacharyya, R. Ranjan, C. Narayana, J. Hulliger and T. N. G. Row, *J. Phys. Chem. C*, 2017, **121**, 18317.
